# Supplementary material for: Differential Role of Psychosocial, Health Care System and Neighborhood Factors on the Retention in HIV Care of Women and Men in the Ryan White Program
Source: PubMed Central journal article supplement — J Int Assoc Provid AIDS Care. 2020 Aug 20;19:2325958220950087. doi: 10.1177/2325958220950087 (PMC7444131; doi:10.1177/2325958220950087), 2020-08-20
Supplement: Supplemental_Table_1_4.19.20.pdf [file Supplemental_Table_1_4.19.20.pdf]

Supplemental Table 1: Neighborhood-level (ZIP code tabulation level) variables used for indices and their factor loadings

| Index                                                                                          | Variables within index                                                                                                                                                                                                 | Factor loading |
|------------------------------------------------------------------------------------------------|------------------------------------------------------------------------------------------------------------------------------------------------------------------------------------------------------------------------|----------------|
| Low socioeconomic Status                                                                       | Public assistance – [% of households receiving public assistance in the past 12 months for household (B19057)]                                                                                                         | 0.50967        |
|                                                                                                | No access to a car- [% of households without access to a car (B08201)]                                                                                                                                                 | 0.73343        |
|                                                                                                | Crowding- [% of households with $\geq 1$ person per room (S2501)]                                                                                                                                                      | 0.81099        |
|                                                                                                | Poverty status- [% of people living below the federally defined poverty line (S1701)]                                                                                                                                  | 0.92761        |
|                                                                                                | Not wealthy <sup>1</sup> - [% of owner-occupied home worth less than or equal to \$300,000 (B25075)]                                                                                                                   | 0.80435        |
|                                                                                                | Low income- [% of households with annual income < \$15,000 (S1901)]                                                                                                                                                    | 0.87884        |
|                                                                                                | Not high income <sup>1</sup> - [% of households with annual income less than or equal to \$150,000 (S1901)]                                                                                                            | 0.84413        |
|                                                                                                | Income disparity- [Ratio of low income to high income (derived from percent of households with annual income < \$10,000 and percent of households with annual income $\geq$ \$50,000) (S1901)]                         | 0.90389        |
|                                                                                                | Low education- [% of population aged 25 and over with less than 12th grade education (S1501)]                                                                                                                          | 0.85472        |
|                                                                                                | No graduate or professional degree <sup>1</sup> - [% of population aged 25 and over without a graduate or professional degree (S1501)]                                                                                 | 0.77590        |
|                                                                                                | Renting a house- [% of households living in rented house (B25003)]                                                                                                                                                     | 0.67080        |
|                                                                                                | Unemployment- [% of population age 16 and over unemployed (S2301)]                                                                                                                                                     | 0.74075        |
|                                                                                                | Not employed in high class work <sup>1</sup> - [% of population aged 16 and over not employed in high working class occupations (ACS occupation group: “managerial, business, science, and arts occupations”) (S2401)] | 0.87390        |
| Non-Hispanic Black- [% Non-Hispanic Black (B03002)]                                            | 0.51664                                                                                                                                                                                                                |                |
| Do not speak English <sup>1</sup> - [% do not speak English well for all populations (C16001)] | 0.45081                                                                                                                                                                                                                |                |
| Residential instability and homicide                                                           | Moving within county- [% population moved within same county (B07003)]                                                                                                                                                 | 0.69500        |
|                                                                                                | Homicides- [Number of homicides by ZIP codes]                                                                                                                                                                          | 0.69573        |
| Excluded variables <sup>2</sup>                                                                | Median income in 2013- [Median household income in 2013 (B19013)]                                                                                                                                                      |                |
|                                                                                                | Hispanic- [Percent Hispanic/Latino (B03001)]                                                                                                                                                                           |                |

US Born- [Percent born in the US (B05002)]

Non-Hispanic White- [Percent Non-Hispanic White (B03003)]

Not Moving- [Percent population same house 1 year ago  
(B07003)]

Moving from different county- [Percent population that moved  
from different county within same state (B07003)]

Moving from different state- [Percent population that moved from  
different state (B07003)]

Moving from abroad- [Percent population that moved from  
abroad (B07003)]

---

<sup>1</sup> Reverse coded from original

<sup>2</sup> Excluded based on Cronbach's alpha
