# Supplementary material for: Differential Role of Psychosocial, Health Care System and Neighborhood Factors on the Retention in HIV Care of Women and Men in the Ryan White Program
Source: PubMed Central journal article supplement — J Int Assoc Provid AIDS Care. 2020 Aug 20;19:2325958220950087. doi: 10.1177/2325958220950087 (PMC7444131; doi:10.1177/2325958220950087), 2020-08-20
Supplement: Supplemental_Table_2_7.11.20.pdf [file Supplemental_Table_2_7.11.20.pdf]

**Supplemental Table 2. Percent of people retained in care by gender, race/ethnicity and US nativity among Miami-Dade County Ryan White Program clients, 2017**

|              | US-born  |                   |                       | Non-US born |                   |                       | P-value |
|--------------|----------|-------------------|-----------------------|-------------|-------------------|-----------------------|---------|
|              | Total, n | Retained<br>n (%) | Not Retained<br>n (%) | Total, n    | Retained<br>n (%) | Not retained<br>n (%) |         |
| <b>Women</b> |          |                   |                       |             |                   |                       |         |
| Hispanic     | 53       | 36 (67.9)         | 17 (32.1)             | 433         | 383 (88.5)        | 50 (11.6)             | <0.0001 |
| Haitian      | 22       | 15 (68.2)         | 7 (31.8)              | 375         | 335 (89.3)        | 40 (10.7)             | 0.0028  |
| NHB          | 579      | 467 (80.7)        | 112 (19.3)            | 89          | 80 (89.9)         | 9 (10.1)              | 0.0353  |
| NHW          | 47       | 36 (76.6)         | 11 (23.4)             | 11          | 9 (81.8)          | 2 (18.2)              | 0.7085  |
| <b>Men</b>   |          |                   |                       |             |                   |                       |         |
| Hispanic     | 343      | 274 (79.8)        | 69 (20.1)             | 3160        | 2755 (87.2)       | 405 (12.8)            | 0.0002  |
| Haitian      | 36       | 30 (83.3)         | 6 (16.7)              | 314         | 270 (86.0)        | 44 (14.0)             | 0.6665  |
| NHB          | 941      | 687 (73.0)        | 254 (27.0)            | 122         | 105 (86.1)        | 17 (13.9)             | 0.0018  |
| NHW          | 290      | 234 (80.7)        | 56 (19.3)             | 124         | 107 (86.3)        | 17 (13.7)             | 0.1708  |

NHB = Non-Hispanic Black, NHW = Non-Hispanic White.
